# Supplementary material for: BSMV-Mediated Assays for Oat Functional Genomics
Source: Preprints.org preprint supplement (doi:10.20944/preprints202407.1442.v1), 2024-07-18
Supplement: Supplementary file 1 [file supplementary]

>BSMV-gamma PCR+eGFP (GFP sequence is highlighted in yellow, RBS sequence is underlined)

CTTCCGCTTCCTCGCTCACTGACTCGCTGCGCTCGGTCGTTCGGCTGCGGCGAGCGGTATCAGCTCACTCAAAGGCGGTAATACGGTTATCCACAGAATCAGGGGATAACGCAGGAAAGAACATGTGAGCAAAAGGCCAGCAAAAGGCCAGGAACCGTAAAAAGGCCGCGTTGCTGGCGTTTTTCCATAGGCTCCGCCCCCCTGACGAGCATCACAAAAATCGACGCTCAAGTCAGAGGTGGCGAAACCCGACAGGACTATAAAGATACCAGGCGTTTCCCCCTGGAAGCTCCCTCGTGCGCTCTCCTGTTCCGACCCTGCCGCTTACCGGATACCTGTCCGCCTTTCTCCCTTCGGGAAGCGTGGCGCTTTCTCATAGCTCACGCTGTAGGTATCTCAGTTCGGTGTAGGTCGTTCGCTCCAAGCTGGGCTGTGTGCACGAACCCCCCGTTCAGCCCGACCGCTGCGCCTTATCCGGTAACTATCGTCTTGAGTCCAACCCGGTAAGACACGACTTATCGCCACTGGCAGCAGCCACTGGTAACAGGATTAGCAGAGCGAGGTATGTAGGCGGTGCTACAGAGTTCTTGAAGTGGTGGCCTAACTACGGCTACACTAGAAGAACAGTATTTGGTATCTGCGCTCTGCTGAAGCCAGTTACCTTCGGAAAAAGAGTTGGTAGCTCTTGATCCGGCAAACAAACCACCGCTGGTAGCGGTGGTTTTTTTGTTTGCAAGCAGCAGATTACGCGCAGAAAAAAAGGATCTCAAGAAGATCCTTTGATCTTTTCTACGGGGTCTGACGCTCAGTGGAACGAAAACTCACGTTAAGGGATTTTGGTCATGAGATTATCAAAAAGGATCTTCACCTAGATCCTTTTAAATTAAAAATGAAGTTTTAAATCAATCTAAAGTATATATGAGTAAACTTGGTCTGACAGTTACCAATGCTTAATCAGTGAGGCACCTATCTCAGCGATCTGTCTATTTCGTTCATCCATAGTTGCCTGACTCCCCGTCGTGTAGATAACTACGATACGGGAGGGCTTACCATCTGGCCCCAGTGCTGCAATGATACCGCGAGACCCACGCTCACCGGCTCCAGATTTATCAGCAATAAACCAGCCAGCCGGAAGGGCCGAGCGCAGAAGTGGTCCTGCAACTTTATCCGCCTCCATCCAGTCTATTAATTGTTGCCGGGAAGCTAGAGTAAGTAGTTCGCCAGTTAATAGTTTGCGCAACGTTGTTGCCATTGCTACAGGCATCGTGGTGTCACGCTCGTCGTTTGGTATGGCTTCATTCAGCTCCGGTTCCCAACGATCAAGGCGAGTTACATGATCCCCCATGTTGTGCAAAAAAGCGGTTAGCTCCTTCGGTCCTCCGATCGTTGTCAGAAGTAAGTTGGCCGCAGTGTTATCACTCATGGTTATGGCAGCACTGCATAATTCTCTTACTGTCATGCCATCCGTAAGATGCTTTTCTGTGACTGGTGAGTACTCAACCAAGTCATTCTGAGAATAGTGTATGCGGCGACCGAGTTGCTCTTGCCCGGCGTCAATACGGGATAATACCGCGCCACATAGCAGAACTTTAAAAGTGCTCATCATTGGAAAACGTTCTTCGGGGCGAAAACTCTCAAGGATCTTACCGCTGTTGAGATCCAGTTCGATGTAACCCACTCGTGCACCCAACTGATCTTCAGCATCTTTTACTTTCACCAGCGTTTCTGGGTGAGCAAAAACAGGAAGGCAAAATGCCGCAAAAAAGGGAATAAGGGCGACACGGAAATGTTGAATACTCATACTCTTCCTTTTTCAATATTATTGAAGCATTTATCAGGGTTATTGTCTCATGAGCGGATACATATTTGAATGTATTTAGAAAAATAAACAAATAGGGGTTCCGCGCACATTTCCCCGAAAAGTGCCACCTAAATTGTAAGCGTTAATATTTTGTTAAAATTCGCGTTAAATTTTTGTTAAATCAGCTCATTTTTTAACCAATAGGCCGAAATCGGCAAAATCCCTTATAAATCAAAAGAATAGACCGAGATAGGGTTGAGTGTTGTTCCAGTTTGGAACAAGAGTCCACTATTAAAGAACGTGGACTCCAACGTCAAAGGGCGAAAAACCGTCTATCAGGGCGATGGCCCACTACGTGAACCATCACCCTAATCAAGTTTTTTGGGGTCGAGGTGCCGTAAAGCACTAAATCGGAACCCTAAAGGGAGCCCCCGATTTAGAGCTTGACGGGGAAAGCCGGCGAACGTGGCGAGAAAGGAAGGGAAGAAAGCGAAAGGAGCGGGCGCTAGGGCGCTGGCAAGTGTAGCGGTCACGCTGCGCGTAACCACCACACCCGCCGCGCTTAATGCGCCGCTACAGGGCGCGTCCCATTCGCCATTCAGGCTGCGCAACTGTTGGGAAGGGCGATCGGTGCGGGCCTCTTCGCTATTACGCCAGCTGGCGAAAGGGGGATGTGCTGCAAGGCGATTAAGTTGGGTAACGCCAGGGTTTTCCCAGTCACGACGTTGTAAAACGACGGCCAGTGAATTAATACGACTCACTATAGTATAGCTTGAGCATTACCGTCGTGTAATTGCAACACTTGGCTTGCCAAATAACGCTAAAGCGTTCACGAAACAAACAACACTTCGGCATGGATGTTGTGAAGAAATTCGCCGTCATGTCAGTGACTGTAGTAGCAGGTCCCGTCCTTACGCTTTCATCACCTGTGGTGGTGACGTTTGGAACAGGCTTAATTGCCGTATCTTTGGTGAAACGGTTGCTACAGGAACAACCCCGTGTAATTGCTCACGATCACGAACATTACCCAGGTGGTTCTGAGAGCAGTTCTAGCTCTTGTGCTACCGCGCCTATTTTACGTAATCTTTCGCGAGATCAGTGCGATTCAGAGAATATTGGATGCAGTTCTAGCGCCTGTTCTCCGTCTGAAATTGTGAAAGTTACAAGGCAGGTAGTGGGAGTTGAACGTGGTCTTTACCGGGACATTTTTCAGGACAACGAAATCCCATCAGTCATGGAAGAGAAACTGCAGAAACTCCTTTACTCTGAGGGTGAGAAGATTCGAAGACGTTGCCAATTTGAAGCATCAACGATGCACTCACGCAAAGTAAAGGTTCCGGAGGTAGGTACTATCCCAGATATCCAAACTTGGTTCGATGCTACGTTTCCTGGTAACTCCGTTAGGTTTTCTGATTTCGACGGTTATACTGTTGCTACGGAGGACATTAACATGGATGTTCAGGATTGTAGACTTAAGTTCGGGAAGACTTTTCGACCTTATGAATTTAAGGAATCACTGAAACCAGTACTGAGGACAGCAATGCCAGAAAAACGACAGGGTAGTTTGATTGAAAGTGTGCTGGCCTTTCGTAAAAGAAATTTGGCTGCGCCCAGATTACAAGGAGCTTTGAATGAATGGCACACAATTGAGAATGTGCTAACGAAGGCGTTAAAGGTATTCTTCTTTGAAGATTTAATTGATCGAACGGATCACTGCACTTACGAGTCAGCGCTCAGATGGTGGGATAAACAATCAGTGACAGCTCGAGCGCAGCTCGTGGCGGATCAGCGGAGGTTATGTGATGTTGACTTCACGACTTATAACTTCATGATAAAAAATGATGTAAAGCCGAAGTTAGATCTAACACCTCAAGTTGAATATGCAGCTTTGCAGACTGTTGTATATCCTGATAAGATAGTCAATGCTTTCTTTGGTCCGATCATAAAGGAGATTAATGAACGGATCATCAGAGCGCTTAGACCTCATGTGGTCTTTAATTCTCGTATGACTGCTGATGAACTGAATGAAACAGCTGCCTTTTTGACACCTCATAAGTACAGAGCCTTAGAGATTGATTTTTCAAAATTTGATAAATCAAAGACTGGGCTTCATATCAAAGCTGTCATTGGACTCTATAAGCTCTTTGGCCTAGATGGCCTGTTAAAAGTGCTCTGGGAAAAATCGCAATATCAGACTTACGTGAAAGATAGAAACTTCGGTCTCGAGGCATATCTATTGTATCAGCAAAAGTCAGGAAATTGTGACACTTACGGTTCGAACACCTGGTCTGCCGCCTTGGCGTTGTTAGATTGTCTTCCTTTGGAAGATGCACATTTCTGTGTATTTGGTGGTGATGATTCATTGATATTGTTTGATCAGGGATACATAATTTCCGACCCATGCCGGCAACTTGCCGGTACTTGGAATCTTGAATGTAAAGTGTTCGACTTCAAGTACCCCGCATTTTGTGGTAAATTTCTGCTGTGCATAGATGGAAAATATCAATTTGTTCCAGATGCGGCAAAATTTATCACAAAATTAGGTAGAACTGATGTGAGAGATGTAGAAGTTTTGAGTGAGATTTATATCTCTATCAATGACAATTACAAATCTTACAAAGACTTTAAGGTGCTTGATGCTTTGGATAAGGCTTTAGTGGATAGATATCGATCCCCTTATAGTGCTATTTCTGCTTTGGTTTCTTTATGTTATCATATCTTTGACTTTAATAAGTTTAAGTTGCTGTTTAATTGTGAAGGGAAATTTGTGGATAAGAAGCTGAGAAAAGACTTCGAGTGGTGAACTCTAGGTCCTGATGTTTAAATCTACTGTATTTACCTTCGCATGATGGCTACTTTCTCTTGTGTGTGTTGTGGTACCTTAACTACAAGTACTTACTGTGGTAAGAGATGTGAGCGAAAGCATGTATATTCTGAAACAAGAAATAAGAGATTGGAACTTTACAAGAAGTATCTATTGGAACCGCAAAAATGCGCCCTGAATGGAATCGTTGGACACAGTTGTGGAATGCCATGCTCCATTGCGGAAGAGGCTTGTGATCAACTGCCAATCGTGAGTAGGTTCTGTGGCCAAAAGCATGCGGATCTGTATGATTCACTTCTGAAACGTTCTGAACAGGAGTTACTTCTTGAATTTCTCCAGAAGAAGATGCAGGAGCTGAAACTTTCTCATATCGTAAAAATGGCTAAGCTTGAAAGTGAGGTTAACGCAATACGTAAGTCCGTAGCTTCTTCTTTTGAAGATTCTGTTGGATGTGATGATTCTTCTTCCGTTGCTAGCTGAGCGGCCCCACTCATTCCCAAGGGAATAACCCTGATCACTGGTGCAAACGCAAAAAGGCCATCCGTCAGGATGGCCTTCTGCTTAATTTGATGCCTGGCAGTTTATGGCGGGCGTCCTGCCCGCCACCCTCCGGGCCGTTTTACTTGTATAATTCGTCCATCCCTAACGTAATACCTGCGGCGGTCACAAACTCCAGAAGAACCATGTGATCGCGCTTCTCATTAGGATCTTTAGACAGAGCAGACTGGGTGGACAAATAGTGGTTATCTGGCAGAAGTACGGGACCGTCTCCAATGGGAGTATTCTGTTGGTAATGGTCTGCTAACTGGACGCTTCCATCTTCAATGTTGTGACGGATTTTAAAGTTAACCTTGATTCCGTTCTTTTGCTTGTCGGCCATAATATACACATTGTGACTGTTATAGTTGTATTCTAACTTATGGCCCAAAATGTTACCGTCTTCTTTAAAATCGATACCCTTTAACTCGATACGATTGACTAAAGTGTCCCCCTCGAATTTGACTTCGGCGCGAGTTTTATAATTCCCGTCGTCCTTGAAGAAGATTGTACGTTCCTGGACGTAGCCCTCGGGCATAGCAGATTTAAAAAAATCATGCTGTTTCATATGGTCCGGATAACGGCTGAAGCATTGGACTCCGTAGGTTAAAGTAGTCACAAGGGTCGGCCAAGGAACAGGCAGTTTGCCGGTGGTGCAAATAAATTTCAGCGTCAACTTACCATAAGTAGCATCGCCTTCCCCTTCCCCGCTCACGCTAAATTTGTGTCCATTAACGTCTCCGTCAAGCTCGACCAAGATGGGGACTACCCCAGTGAAAAGCTCTTCTCCCTTGGATACCATCTAGTATTTCTCCTCTTTCACTAGTAGCTAGCACTGTACCTAGGACTGAGCTAGCCGTCAACGATCTCTCAACCTACATAACCTGCCCGCAAGCTTGGATTAATCAGCTAGCTAAAAAAAAAAAAAAATGTTTGATCAGATCATTCAAATCTGATGGTGCCCATCAACCATATGATGGGAGTGTTTGCAAGTCCACTATAATCGAACTTGAAAACGATGCCTGAATTGGAAACCATGAATCTTAACGGACTCTGGAGAGAAAATTTAGGAATTGGTATGTAAGCTACAACTTCCGGTAGCTGCGTCACACTTTAAGAGTGTGCATACTGAGCCGAAGCTCAGCTTCGGTCCCCCAAGGGAAGACCACGCGTCATGCAAGCTTGGCGTAATCATGGTCATAGCTGTTTCCTGTGTGAAATTGTTATCCGCTCACAATTCCACACAACATACGAGCCGGAAGCATAAAGTGTAAAGCCTGGGGTGCCTAATGAGTGAGCTAACTCACATTAATTGCGTTGCGCTCACTGCCCGCTTTCCAGTCGGGAAACCTGTCGTGCCAGCTGCATTAATGAATCGGCCAACGCGCGGGGAGAGGCGGTTTGCGTATTGGGCGCT
